# Supplementary material
Source: MDPI journal article supplement (https://www.mdpi.com/1424-2818/15/7/874)
Supplement: s1 [file s1]

**Table S2.** Numbers of plant species belonging to the main floristic chorotypes and their relevant percent (%) recorded in El Sheikh Fadl–Ras Gharib Road.

| <b>Chorotype</b>                  | <b>No. of plant species</b> | <b>Percentage (%)</b> |
|-----------------------------------|-----------------------------|-----------------------|
| COSM                              | 2                           | 2.151                 |
| PAL                               | 1                           | 1.075                 |
| <b>Total</b>                      | <b>3</b>                    | <b>3.226</b>          |
| <b>Monoregional</b>               |                             |                       |
| SS                                | 1                           | 1.075                 |
| <b>Total</b>                      | <b>1</b>                    | <b>1.075</b>          |
| <b>Biregional</b>                 |                             |                       |
| IT + SS                           | 2                           | 2.151                 |
| ME + SS                           | 3                           | 3.226                 |
| SS + SZ                           | 6                           | 6.452                 |
| <b>Total</b>                      | <b>11</b>                   | <b>11.828</b>         |
| <b>Pleuriregional</b>             |                             |                       |
| CAP + ES + IT + ME + SJ + SS + SZ | 1                           | 1.075                 |
| CAP + GC + IT + ME + SS + SZ      | 2                           | 2.151                 |
| CAP + IT + ME + SS + SZ           | 1                           | 1.075                 |
| ES + IT + ME + SJ + SS + SZ       | 3                           | 3.226                 |
| ES + IT + ME + SS + SJ            | 1                           | 1.075                 |
| ES + IT + ME + SS + SZ            | 4                           | 4.301                 |
| ES + ME + SS                      | 1                           | 1.075                 |
| GC + SS + SZ                      | 1                           | 1.075                 |
| IT + ME + SJ + SS + SZ            | 1                           | 1.075                 |
| IT + ME + SS                      | 13                          | 13.978                |
| IT + ME + SS + SZ                 | 46                          | 49.462                |
| IT + SS + SZ                      | 2                           | 2.151                 |
| ME + SS + SZ                      | 2                           | 2.151                 |
| <b>Total</b>                      | <b>78</b>                   | <b>83.871</b>         |

**Chorotypes abbreviations:** AUS: Australian, COSM: Cosmopolitan, ME: Mediterranean, NEO: Neotropical, PAL: Palaeotropical, PAN: Pantropical, ES: Euro-Siberian, IT: Irano-Turanian, SA= Saharo-Arabian, SS: Saharo-Sindian, SJ: Sino-Japonic, SZ: Sudano-Zambezian. Life form: Ch.: Chamaephyte, Ge.: Geophyte, GH: Geophyte-Helophyte, Hem.: Hemicryptophyte, Hy: Hydrophyte, HHe: Hydrophyte-Helophyte, Pa.: Parasite, Ph.: Phanerophyte, Th.: Therophyte.
