# Supplementary material
Source: MDPI journal article supplement (https://www.mdpi.com/1424-2818/15/7/874)
Supplement: s1 [file s1]

**Table S1.** Life form spectrum of plant species recorded in El Sheikh Fadl–Ras Gharib Road.

| <b>Life form</b>     | <b>Number of species</b> | <b>% of collected species</b> |
|----------------------|--------------------------|-------------------------------|
| Holoparasitic        | 1                        | 1.08                          |
| Geophytes            | 1                        | 1.08                          |
| Hemicryptophytes     | 14                       | 15.05                         |
| Geophytes-Helophytes | 1                        | 1.08                          |
| Chamaephytes         | 28                       | 30.11                         |
| Phanerophytes        | 6                        | 6.45                          |
| Therophytes          | 42                       | 45.16                         |
| <b>Total</b>         | <b>93</b>                | <b>100</b>                    |
